# Whole-genome sequencing of parvoviruses from wild and domestic animals in Brazil provides new insights into parvovirus distribution and diversity

William Marciel de Souza <sup>1,\*</sup>, Tristan Philip Wesley Dennis <sup>2</sup>, Marcílio Jorge Fumagalli <sup>1</sup>, Jansen de Araujo <sup>3</sup>, Gilberto Sabino-Santos Jr <sup>1</sup>, Felipe Gonçalves Motta Maia <sup>1,3</sup>, Gustavo Olszanski Acrani <sup>4</sup>, Adriano de Oliveira Torres Carrasco <sup>5</sup>, Marília Farignoli Romeiro <sup>1</sup>, Sejal Modha <sup>2</sup>, Luiz Carlos Vieira <sup>1</sup>, Tatiana Lopes Ometto <sup>3</sup>, Luzia Helena Queiroz <sup>6</sup>, Edison Luiz Durigon <sup>3</sup>, Márcio Roberto Teixeira Nunes <sup>7</sup>, Luiz Tadeu Moraes Figueiredo <sup>1</sup> and Robert James Gifford <sup>2,\*</sup>

<sup>1</sup> Virology Research Center, Ribeirão Preto Medical School, University of São Paulo, Ribeirão Preto, Brazil; wmarciel@hotmail.com (WMS); marcilio\_jorge@hotmail.com (MJF); sabinogsj@usp.br (GSSJr); felipegmaia@gmail.com (FGMM); mafarignoli@hotmail.com (MFR); luiz\_carlos\_vieira@hotmail.com (LCV); ltmfigue@fmrp.usp.br (LTMF).

<sup>2</sup> MRC-University of Glasgow Centre for Virus Research, Glasgow, United Kingdom; t.dennis.1@research.gla.ac.uk (TPWD); sejal.modha@glasgow.ac.uk (SM); robert.gifford@glasgow.ac.uk (RJG).

<sup>3</sup> Institute of Biomedical Sciences, University of São Paulo, São Paulo, Brazil; jansentequila@usp.br (JA); tatiometto@usp.br (TLO); eldurigo@usp.br (ELD).

<sup>4</sup> Universidade Federal da Fronteira Sul, Passo Fundo, Rio Grande do Sul, Brazil; gacrani@gmail.com (GOA).

<sup>5</sup> Universidade do Centro Oeste do Paraná, Guarapuava, Paraná, Brazil; adriano.carrasco@gmail.com (AOTC).

<sup>6</sup> Faculty of Veterinary Medicine, São Paulo State University, Araçatuba, Brazil; (LHQ).

<sup>7</sup> Center for Technological Innovations, Evandro Chagas Institute, Ministry of Health, Ananindeua, Pará, Brazil; marcionunesbrasil@yahoo.com.br (MRTN).

\* Correspondence: wmarciel@usp.br or wmarciel@hotmail.com; Tel.: +55-16-3315-4580 (William Marciel de Souza) and robert.gifford@glasgow.ac.uk; Tel.: 0141 330 4640 (Robert James Gifford).

**Abstract:** Parvoviruses (family *Parvoviridae*) are small, single-stranded DNA viruses. Many parvoviral pathogens of medical, veterinary and ecological importance have been identified. In this study, we used high-throughput sequencing (HTS) to investigate the diversity of parvoviruses infecting wild and domestic animals in Brazil. We identified 21 parvovirus sequences (including twelve nearly complete genomes and nine partial genomes) in samples derived from rodents, bats, opossums, birds and cattle in Pernambuco, São Paulo, Paraná and Rio Grande do Sul states. These sequences were investigated using phylogenetic and distance-based approaches, and were thereby classified into eight parvovirus species (six of which have not been described previously), representing six distinct genera in the subfamily *Parvovirinae*. Our findings extend the known biogeographic range of previously characterized parvovirus species, and the known host range of three parvovirus genera (*Dependovirus*, *Aveparvovirus*, and *Tetraparvovirus*). Moreover, our investigation provides a window into the ecological dynamics of parvovirus infections in vertebrates, revealing that many parvovirus genera contain well-defined sub-lineages that circulate widely throughout the world within particular taxonomic groups of hosts.

**Keywords:** Parvovirus; *Parvoviridae*; ssDNA viruses; zoonotic viruses.

## 47 1. Introduction

48 Parvoviruses are small, linear and non-enveloped viruses with single-stranded DNA (ssDNA)  
49 genomes ~5-6 kilobases (kb) in length [1]. All parvoviruses possess two major genes, a  
50 non-structural (NS) gene encoding the viral replicase, and a capsid (VP) gene encoding the  
51 structural proteins of the virion [2]. The *Parvoviridae* family is divided into two subfamilies. All  
52 parvoviruses that infect vertebrates falling into one subfamily (*Parvovirinae*), which currently  
53 contains 41 viral species, classified into eight genera [1].

54 Parvoviruses cause disease in humans and domestic animals. For example, parvovirus B19, a  
55 species in the genus *Tetraparvovirus*, causes 'erythema infectiosum' in children and polyarthropathy  
56 syndrome in adults [2], while canine parvovirus, a member of the genus *Protoparvovirus*, can cause  
57 haemorrhagic enteritis in dogs, with lethality around 80% of cases [3].

58 In recent years, high throughput sequencing (HTS) approaches have been instrumental in the  
59 discovery of many novel parvovirus species [4-7]. Consequently, the known diversity of parvovirus  
60 species has expanded greatly, and recent studies have suggested that parvovirus host range may  
61 encompass the entire animal kingdom [8]. To understand the natural biology of vertebrate  
62 parvoviruses – i.e. their dynamics in natural hosts, propensity to cause disease, and zoonotic  
63 potential – it is important to document their distribution and diversity across a wide range of  
64 vertebrate species and populations. In this study, we used a HTS approach to investigate  
65 parvovirus infections among wild mammals and birds in Brazil.

## 66 2. Materials and Methods

### 67 2.1. Samples

68 A total of 1073 specimens obtained from 21 different animal species were collected from 2007  
69 to 2016 from rural areas of Pará, Pernambuco, São Paulo, Paraná, Santa Catarina and the Rio  
70 Grande do Sul states in Brazil. Individual specimens were distributed in 60 pools based on the  
71 species, sample type (i.e., tissue, blood, sera and cloacal swab), date and place of collection  
72 (Supplementary Table 1). The species of wild animals were identified using morphological  
73 characteristics keys as previously described [9-11]. The geographical distribution of the pools is  
74 shown in Figure 1.

### 76 2.2. Preparation of pools, viral genome sequencing and assembly

77 Tissues samples were individually homogenized with Hank's balanced salt solution using the  
78 TissueLyser system (Qiagen, USA). Then, the homogenized tissue, sera, and cloacal swabs were  
79 centrifuged by 5 min at 10,000g, and the pools were prepared as previously described [12]. The viral  
80 genomes were extracted with a QIAamp viral RNA mini kit (Qiagen, USA) and stored at -80°C.  
81 Subsequently, the nucleic acid was quantified using a Qubit® 2.0 Fluorometer (Invitrogen,  
82 Carlsbad, USA) and the purity and integrity of nucleic acid of samples were measured using an  
83 Agilent 2100 Bioanalyzer (Agilent Technologies, USA).

84 The DNAs were prepared for high-throughput sequencing using the RAPID module with the  
85 TruSeq Universal adapter (Illumina, USA) protocols and standard multiplex adaptors. A  
86 paired-end, 150-base-read protocol in RAPID module was used for sequencing on an Illumina  
87 HiSeq 2500 instrument as recommended by the manufacturer. Sequencing was performed in Life  
88 Sciences Core Facility from University of Campinas, Brazil. A total of 7,059,398 to 94,508,748  
89 paired-end reads per pool were generated with 64.85% to 91.45% of bases  $\geq$  Q30 with a base call  
90 accuracy of 99.9% (Supplementary Table 1). The sequencing reads were assembled using the de  
91 novo approach in the metaViC pipeline (<https://github.com/sejmodha/MetaViC>) [12].

92

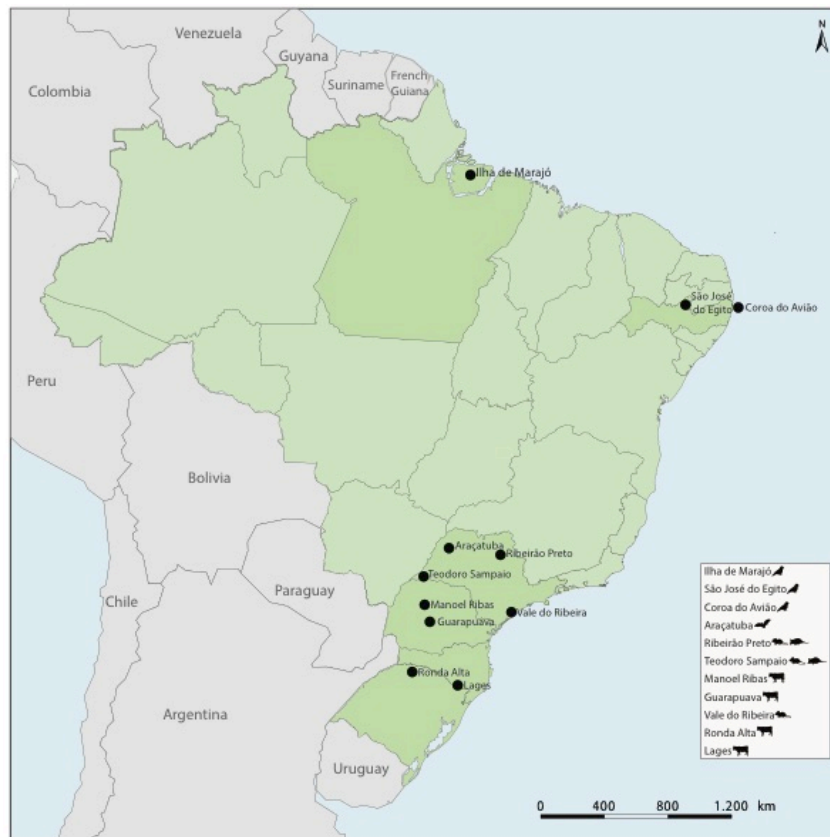

93  
94 **Figure 1.** Geographic locations of collected samples in Brazil.

95  
96 **2.3. Genome characterization**

97 Genome size, coding potential and molecular protein weight were assessed with Geneious  
98 9.1.2 (Biomatters, New Zealand). The annotations of protein domains were performed using the  
99 Conserved Domain Database [13]. The nucleotide sequences determined in this study have been  
100 deposited in GenBank under the accession numbers listed in **Table 1**.

101  
102 **2.4. Phylogenetic analysis**

103 Maximum likelihood (ML) phylogenetic trees were reconstructed using alignments of NS and  
104 VP proteins identified in the present study with representative members of *Parvovirinae* subfamily  
105 [1]. Multiple sequence alignment (MSA) was carried out using RevTrans 2.0 [14] with manual  
106 adjustment. The alignments of core of NS and VP proteins ML trees were inferred by IQ-TREE  
107 version 1.4.3 software based on LG+F+G4 protein substitution model to core of NS protein with 145  
108 amino acids, and LG+F+I+G4 protein substitution model to core of VP protein with 245 amino acids,  
109 both with 1,000 replicates [15,16]. Statistical support for individual nodes was estimated via  
110 bootstrap replicates. Phylogenetic trees were visualized using Figtree 1.4.2. Nucleotide divergence  
111 calculations were performed using the Sequence Demarcation Tool (SDT) version 1.2 in muscle  
112 mode [17].

113 **3. Results**

114 Using HTS we identified 21 parvovirus sequences in samples derived from rodents, bats,  
115 opossums, birds and cattle in Pernambuco, São Paulo, Paraná and Rio Grande do Sul states in  
116 Brazil (**Figure 1**). These sequences comprised twelve nearly complete genomes and nine partial  
117 genomes (**Table 1**), and included the first examples of parvoviruses identified in opossums, New  
118 World bats, and sigmondontine rodents. Parvovirus sequences recovered in our study were  
119 classified on the basis of (i) phylogeny and (ii) pairwise distance.

120  
121

**Table 1.** Sequences information, sources, sample, location, location, date and environment of viruses identified in wild animals from Brazil.

| Genus                    | Viral Species                          | Strain     | Genome   | Size (nt) | Host Species                   | Sample       | N  | Location              | Date            | GenBank  |
|--------------------------|----------------------------------------|------------|----------|-----------|--------------------------------|--------------|----|-----------------------|-----------------|----------|
| <i>Tetraparvovirus</i>   | Rodent<br>tetraparvovirus              | 1135       | Complete | 5494      | <i>Necromys lasiurus</i>       | Blood        | 59 | Ribeirão Preto, SP    | 2008            | MG745669 |
| <i>Tetraparvovirus</i>   | Rodent<br>tetraparvovirus              | 3542       | Complete | 5494      | <i>Necromys lasiurus</i>       | Blood        | 52 | Ribeirão Preto, SP    | 2009            | MG745670 |
| <i>Tetraparvovirus</i>   | Opossum<br>tetraparvovirus             | 4113       | Complete | 5420      | <i>Didelphis albiventris</i>   | Serum        | 14 | Teodoro Sampaio, SP   | 2009            | MG745671 |
| <i>Aveparvovirus</i>     | Pileated finch<br>aveparvovirus        | 29         | Complete | 5368      | <i>Coryphospingus pileatus</i> | Cloacal Swab | 4  | São José do Egito, PE | 2010            | MG745672 |
| <i>Bocaparvovirus</i>    | Rodent<br>bocaparvovirus               | 1          | Complete | 5227      | <i>Necromys lasiurus</i>       | Blood        | 58 | Ribeirão Preto, SP    | 2008            | MG745673 |
| <i>Protoparvovirus</i>   | Rodent<br>protoparvovirus              | 9424       | Complete | 5219      | <i>Necromys lasiurus</i>       | Blood        | 58 | Ribeirão Preto, SP    | 2008            | MG745674 |
| <i>Protoparvovirus</i>   | Rodent<br>protoparvovirus              | 284        | Complete | 5196      | <i>Akodon montensis</i>        | Blood        | 41 | Ribeirão Preto, SP    | 2009            | MG745675 |
| <i>Protoparvovirus</i>   | Rodent<br>protoparvovirus              | 119        | Complete | 4998      | <i>Calomys tener</i>           | Blood        | 38 | Ribeirão Preto, SP    | 2008            | MG745676 |
| <i>Dependoparvovirus</i> | Desmodus rotundus<br>dependoparvovirus | 246        | Complete | 4894      | <i>Desmodus rotundus</i>       | Kidney       | 8  | Araçatuba, SP         | 2010            | MG745677 |
| <i>Protoparvovirus</i>   | Rodent<br>protoparvovirus              | 2          | Complete | 4898      | <i>Necromys lasiurus</i>       | Blood        | 59 | Ribeirão Preto, SP    | 2008            | MG745678 |
| <i>Tetraparvovirus</i>   | Ungulate<br>tetraparvovirus            | MR         | Complete | 5368      | <i>Bos taurus</i>              | Blood        | 15 | Manoel Ribas, PR      | 2016            | MG745679 |
| <i>Erythroparvovirus</i> | Bovine<br>parvovirus 3                 | Ronda Alta | Complete | 5220      | <i>Bos taurus</i>              | Blood        | 6  | Ronda Alta, RS        | 2016            | MG745680 |
| <i>Protoparvovirus</i>   | Rodent<br>protoparvovirus              | 1594       | Partial  | 2255      | <i>Didelphis albiventris</i>   | Blood        | 32 | Ribeirão Preto, SP    | 2012-2013       | MG745681 |
| <i>Bocaparvovirus</i>    | Rodent<br>bocaparvovirus               | 4093       | Partial  | 2844      | <i>Necromys lasiurus</i>       | Blood        | 52 | Ribeirão Preto, SP    | 2009            | MG745682 |
| <i>Protoparvovirus</i>   | Rodent<br>protoparvovirus              | 8          | Partial  | 1679      | <i>Calomys tener</i>           | Blood        | 34 | Ribeirão Preto, SP    | 2009, 2012-2013 | MG745683 |
| <i>Protoparvovirus</i>   | Rodent<br>protoparvovirus              | 888        | Partial  | 1606      | <i>Oligoryzomys nigripes</i>   | Blood        | 20 | Ribeirão Preto, SP    | 2012-2013       | MG745684 |
| <i>Protoparvovirus</i>   | Rodent<br>protoparvovirus              | 23         | Partial  | 1566      | <i>Akodon montensis</i>        | Blood        | 55 | Ribeirão Preto, SP    | 2008            | MG745685 |
| <i>Bocaparvovirus</i>    | Rodent<br>bocaparvovirus               | 422        | Partial  | 1362      | <i>Necromys lasiurus</i>       | Blood        | 52 | Ribeirão Preto, SP    | 2009            | MG745686 |

|                        |        |      |         |      |                      |       |    |           |        |          |
|------------------------|--------|------|---------|------|----------------------|-------|----|-----------|--------|----------|
| <i>Protoparvovirus</i> | Rodent | 1010 | Partial | 1283 | <i>Oligoryzomys</i>  | Blood | 20 | Ribeirão  | 2012-2 | MG745687 |
| protoparvovirus        |        |      |         |      | <i>nigripes</i>      |       |    | Preto, SP | 013    |          |
| <i>Protoparvovirus</i> | Rodent | 66   | Partial | 1099 | <i>Akodon</i>        | Blood | 55 | Ribeirão  | 2008   | MG745688 |
| protoparvovirus        |        |      |         |      | <i>montensis</i>     |       |    | Preto, SP |        |          |
| <i>Protoparvovirus</i> | Rodent | 38   | Partial | 1067 | <i>Calomys tener</i> | Blood | 34 | Ribeirão  | 2009,2 | MG745689 |
| protoparvovirus        |        |      |         |      |                      |       |    | Preto, SP | 012-20 |          |
|                        |        |      |         |      |                      |       |    |           | 13     |          |

122 Legend: “N” number of samples per pool, SP (São Paulo State), PR (Paraná State), PE (Pernambuco State), RS (Rio  
123 Grande do Sul State).

124  
125 To investigate the phylogenetic relationships of the novel parvoviruses to those described  
126 previously, we inferred ML phylogenetic trees from alignments of 71 NS proteins and 71 VP  
127 peptide sequences. Phylogenies revealed eight distinct clades corresponding to recognized genera,  
128 each having high bootstrap support (values >75%). The sequences recovered in this study grouped  
129 into six distinct genera (Figure 2). In most cases, the newly identified sequences grouped robustly  
130 within the established diversity of their respective genera. Only the *Dependoparvovirus*-like sequence  
131 identified in our study grouped in a basal position with respect to previously characterized taxa in  
132 both NS and VP trees.

133

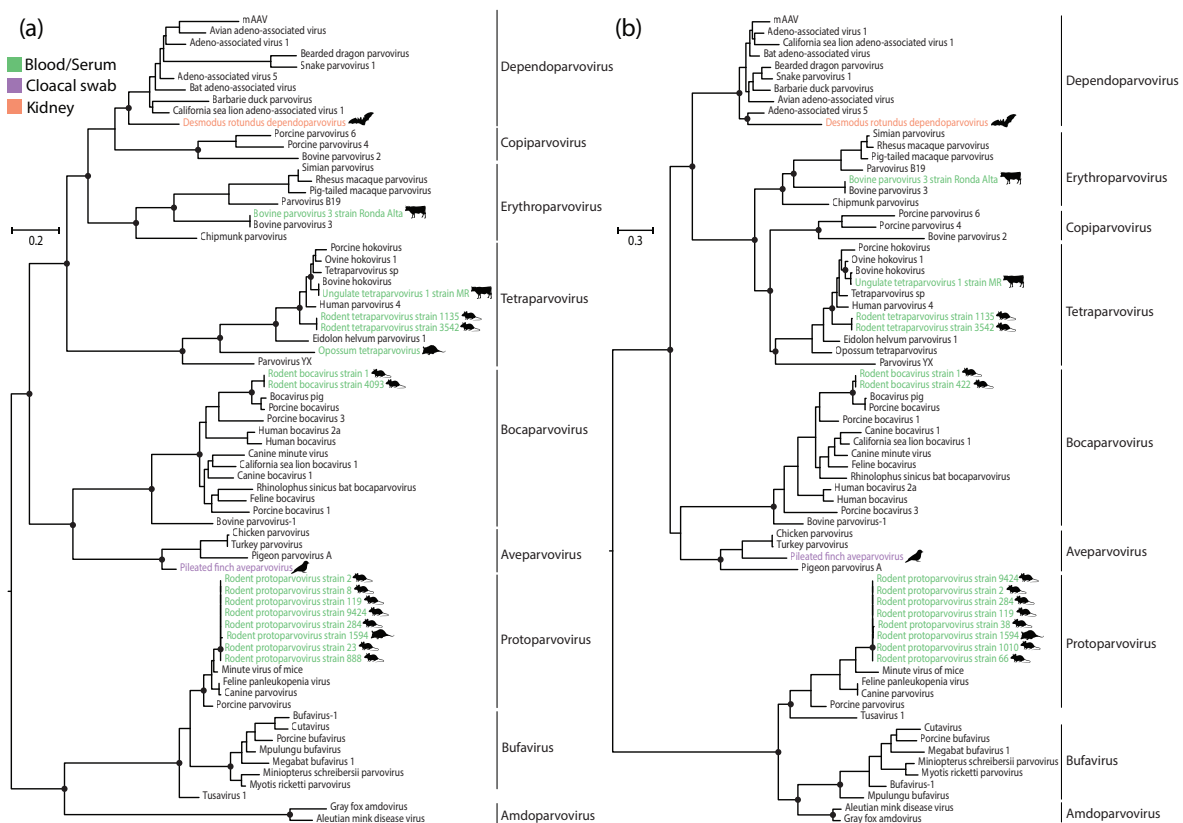

134

135 **Figure 2.** Maximum likelihood phylogenies showing the evolutionary relationships of newly  
136 identified parvoviruses. (a) Phylogenetic tree of NS proteins. (b) Phylogenetic tree of VP proteins.  
137 Phylogenies are midpoint rooted for clarity of presentation. The scale bar indicates evolutionary  
138 distance in substitutions per amino acid site. Black lines indicate genera within the *Parvovirinae*  
139 subfamily. Black circles indicate nodes with maximum likelihood bootstrap support levels >75%,  
140 based on 1,000 bootstrap replicates. Taxa names of parvoviruses identified in our study are colored  
141 according to sample type, as shown in the key. Silhouettes indicate host species groups.

142

143

144 According to the species demarcation criteria of the International Committee on Taxonomy of  
145 Viruses (ICTV), parvoviruses in the same species should share >85% amino acid sequence identity  
146 across the entire NS polypeptide sequence [1]. On this basis, the 21 genomes described in this study  
147 represent six novel species of parvoviruses, and two that have been described previously (bovine  
148 parvovirus 3 and ungulate tetraparvovirus 1) (**Supplementary Figures 1 and 2**).

148

149 We identified a novel species of protoparvovirus in sigmondontine rodents. This virus, which  
150 was detected in samples from several distinct animal and species (**Table 1**), is quite similar to  
151 minute virus of mice (MVM), but is sufficiently distinct based on ICTV criteria to be considered a  
152 distinct species. We also identified novel tetraparvoviruses in the opossum and hairy-tailed bolo  
153 mouse, and a novel dependoparvovirus in tissue samples derived from common vampire bats  
154 (*Desmodus rotundus*). We identified a novel bocaparvovirus species - rodent bocaparvovirus - in two  
155 distinct sample pools obtained from hairy-tailed bolo mice, and a novel aveparvovirus in grey  
156 pileated finch in São José do Egito, Pernambuco State, Brazil. We also identified strains of two  
157 parvoviruses that previously detected in cattle, bovine parvovirus 3 and ungulate tetraparvovirus 1,  
158 identified in cattle serum of Ronda Alta in the Rio Grande do Sul State and Manoel Ribas in Paraná  
159 State, respectively, both located in South of Brazil.

159

160 All the viruses identified in our study have typical parvovirus genome structures encoding NS  
161 and VP proteins. The deduced NS protein sequences from these viruses contains the "HxH" and  
162 "GPASTGKS" motifs, which play a critical role in viral DNA replication [20]. Most of the capsid  
163 proteins also possess the PLA<sub>2</sub> motif involved in particle release [21], and the glycine-rich (G-rich)  
164 region required for cellular entry [22]. Interestingly, we observed that one species, *Desmodus*  
165 *rotundus* dependoparvovirus encodes NS and VP as overlapping ORFs, with a shared region of 47  
166 nucleotides (**Figure 3**).

166

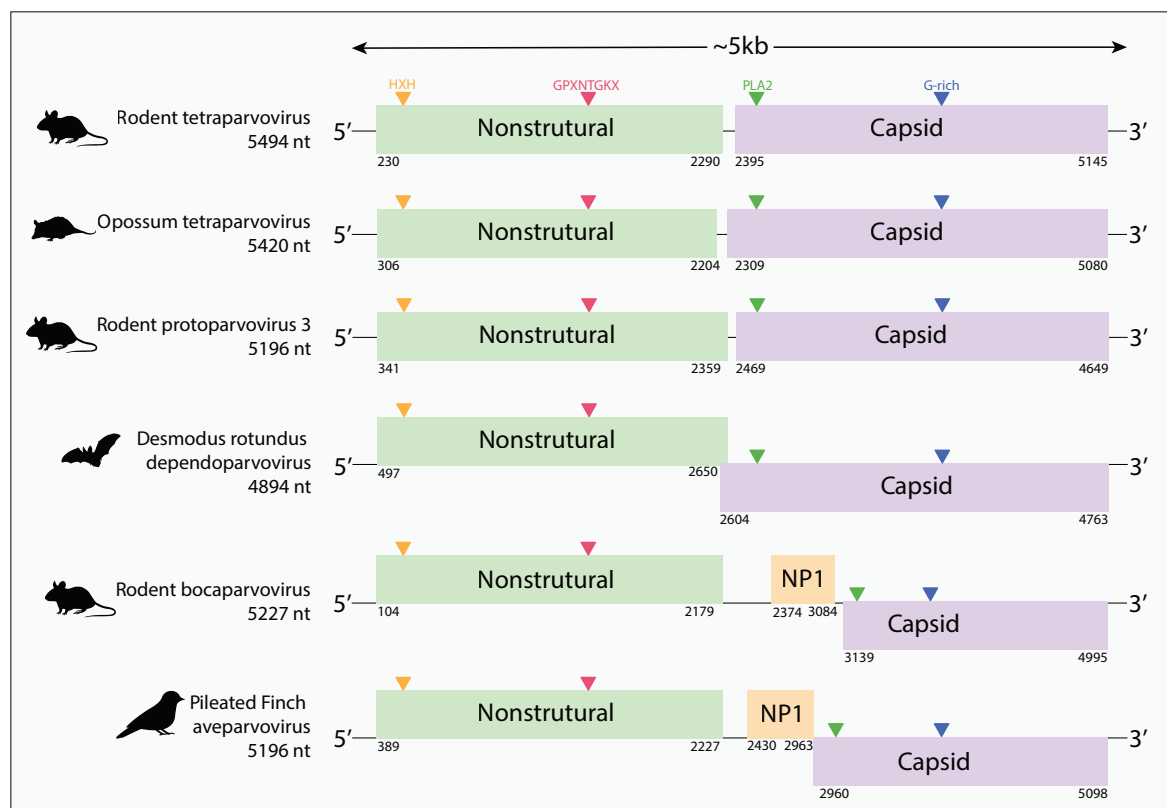

167

168

169

170

**Figure 3.** Genome structures of newly identified parvoviruses. The length of the determined nucleotide sequences of the viral sequences are shown in the left. Boxes indicate the open reading frames (ORFs), and the number represent their respective position of ORFs.



171  
172  
173  
174  
175  
176  
177  
178  
179

Notably, the rodent bocaparvoviruses and pileated finch aveparvovirus contain a putative additional ORF (NP1). This gene is located in the middle of the viral genome and overlaps with the C-terminus region of the NS ORF, but in a different reading frame (Figure 3). In the case of the rodent bocaparvoviruses, this ORF may correspond to the NP1 protein, which has been reported to play a role in efficient replication for human and canine bocaparvoviruses [25-27], and in immune evasion for porcine bocaparvoviruses [28].

#### 180 4. Discussion

181 Brazil has a great diversity and abundance of wildlife, and is considered a hotspot for the  
182 potential emergence of novel zoonotic viruses [23]. However, parvovirus studies in Brazil have  
183 focused predominantly on canine parvovirus and human parvovirus B19 [2,24]. In this study, we  
184 used a HTS approach to investigate parvovirus infections among wild mammals and birds  
185 apparently without symptoms or disease from Brazil. We identified 21 parvovirus sequences,  
186 representing six novel and two previously described parvovirus species. We report the first  
187 examples of parvoviruses in samples derived from *Sigmondontinae* rodents, opossums and New  
188 World bats. Interestingly, all of the viruses detected here were sequenced from serum or blood  
189 samples suggesting that viremia may have been a factor in their identification.

190 We detected strains of ungulate tetraparvovirus – a virus in the genus *Tetraparvovirus* - in cattle  
191 from the South of Brazil. Ungulate tetraparvovirus 2 (formerly known as porcine hokovirus) has  
192 previously been identified in swine in Brazil [29]. However, ungulate tetraparvovirus 1 (formerly  
193 known as bovine hokovirus) has not previously been reported outside Asia. This virus, which was  
194 originally identified in bovine spleen samples obtained from food markets in Hong Kong, has also  
195 been identified in domestic yaks (*Bos grunniens*) in northwestern China [18,19]. The identification of  
196 this virus in an entirely distinct population (Brazilian cattle) not only establishes that it occurs  
197 outside Asia, but also suggests it may be present in cattle populations throughout the world. In  
198 addition, we identified novel species of tetraparvovirus in samples obtained from rodents, and  
199 from an opossum. Interestingly, the opossum sequence grouped basal relative to the largest  
200 *Tetraparvovirus* clade, which contains isolates from diverse eutherian mammals. Further sampling  
201 may reveal if this basal position reflects the broad co-divergence of tetraparvoviruses and mammals  
202 dating back to the common ancestor of marsupials and eutherians. Such ancient origins of the  
203 *Tetraparvovirus* genus are consistent with evidence from endogenous viral element (EVE) sequences  
204 that parvoviruses have been infecting mammals for millions of years [30,31].

205 Recently, studies have reported numerous novel dependoparvoviruses in samples derived  
206 from Asian bats [32,33]. Here, we provide the first report of a dependoparvovirus in a New World  
207 bat - the vampire bat (*Desmodus rotundus*). In trees based on Rep, this virus groups basally within  
208 the *Dependoparvovirus* genus, consistent with these viruses potentially having an ancestral origin in  
209 bats, as has been proposed previously [32].

210 Currently, only one species is recognised in the genus *Aveparvovirus*. This virus (*Galliform*  
211 *aveparvovirus 1*) infects chickens and turkeys and is widespread in poultry farms in the United  
212 States and Europe [34,35]. We identified a novel *Aveparvovirus* species in samples derived from  
213 pileated finch (*Coryphospingus pileatus*), an indigenous (and non-migratory) South American bird,  
214 suggesting that viruses belonging to the *Aveparvovirus* genus may circulate widely among avian  
215 species, including wild as well as domestic birds.

216 We detected bovine parvovirus 3 (genus *Erythroparvovirus*) in Brazilian cattle. Since this virus -  
217 to the best of our knowledge – has only been described as a contaminant of commercial bovine  
218 serum [36], our study is the first to report detection of bovine parvovirus 3 in cattle populations.

219 We also identified a novel protoparvovirus species infecting sigmodontine rodents in Brazil.  
220 Sigmodontine rodent protoparvovirus was identified in several species of rodents (all belong to  
221 subfamily) that we captured in the Ribeirão Preto region of São Paulo State. These viruses are

222 closely related to *Minute virus of mice* (MVM), a common pathogen of laboratory mice [37], but  
223 following official taxonomic criteria, they are sufficiently divergent from MVM (>85% in NS and  
224 >73% aa in VP) to be considered a distinct species within the *Protoparvovirus* genus.

225 Bocaparvoviruses are associated with pathogenic conditions in human, bovine and canine  
226 hosts [2,38]. Rodent bocaparvoviruses have recently been reported [39], but relatively little is  
227 known about their broader distribution. We identified novel rodent bocaparvoviruses in  
228 sigmodontine rodents that are closely related to bocaparvoviruses recently reported in brown rats  
229 (*Rattus rattus*) in China [39] (data not shown). Together, these findings suggest a broad distribution  
230 for rodent bocaparvoviruses.

231 Parvoviruses that infect domestic and wild carnivores (including amdoviruses and  
232 protoparvoviruses) have been studied fairly extensively in the field. These studies have shown that  
233 groups of closely related parvoviruses circulate widely among species in the order Carnivora, with  
234 the barriers to transmission between species within the order apparently being relatively low  
235 [40-42]. The findings of our study suggests that this pattern might be reflected more broadly in  
236 parvovirus ecology, with many parvovirus genera containing sublineages that circulate within  
237 particular taxonomic groups of hosts (and are largely restricted to this host group). For example, the  
238 phylogenetic relationships shown in Figure 1 indicate that closely related protoparvoviruses  
239 circulate widely among rodents, and that closely related tetraparvoviruses circulate widely in  
240 ungulates. With further sampling of parvovirus diversity it should quickly become apparent  
241 whether these inferences are accurate.

242

## 243 5. Conclusions

244 In this study, we used a sequencing-based approach to characterize parvovirus infections in  
245 wild and domestic animals in Brazil. Our findings extend the known biogeographic range of  
246 previously characterized parvovirus species, and the known host range of three parvovirus genera  
247 (*Dependovirus*, *Aveparvovirus*, and *Tetraparvovirus*). More broadly, our findings indicate that many  
248 parvovirus genera contain well-defined sub-lineages that circulate widely throughout the world  
249 within particular taxonomic groups of hosts.

250 **Supplementary Materials:** The following are available online at [www.mdpi.com/link](http://www.mdpi.com/link), Table S1: Samples  
251 information, host, sources, sample type, location, date, reads, and %Bases  $\geq$ Q30. Figure S1: Heatmap of  
252 pairwise amino acid identities of the NS protein of parvoviruses identified in this study and representative  
253 members of *Parvovirinae* subfamily based on ICTV criteria. The viruses described in this study are highlighted  
254 with bold, Figure S1: Heatmap of pairwise amino acid identities of the VP protein of parvoviruses identified in  
255 this study and representative members of *Parvovirinae* subfamily based on ICTV criteria. The viruses described  
256 in this study are highlighted with bold.

257 **Acknowledgments:** We thank Meire Christina Seki, Janaína Menegazzo Gheller, Luiz Gustavo Betim Góes,  
258 Cristiano de Carvalho, Wagner André Pedro, Luciano M. Thomazelli, Fábio Maués, Marcello Schiavo Nardi,  
259 Severino M. de Azevedo Júnior, Roberto Rodrigues, Renata Hurtado and Felipe Alves Morais, Márcio  
260 Schaefer, Mario Figueiredo, Felipe Morais, Jaqueline R. Silva, Paulo Paulosso, Dercílio Pavanelli, Edison  
261 Montilha, Armando F. A. Nascimento, José Teotônio for help in fieldwork. This work was supported by the  
262 Fundação de Amparo à Pesquisa do Estado de São Paulo, Brazil (Grant number. 13/14929-1, and Scholarships  
263 No. 17/13981-0; 12/24150-9; 15/05778-5; 16/01414-1; 14/20851-8; 06/00572-0; 08/06411-4; 11/06810-9; 11/22663-6;  
264 16/02568-2, 06/00572-0; 09/05994-9 and 11/13821-7). RJG was supported by the Medical Research Council of the  
265 United Kingdom (Grant number MC\_UU\_12014/10).

266 **Author Contributions:** William Marciel de Souza and Robert James Gifford conceived and designed the  
267 experiments; William Marciel de Souza, Tristan Philip Wesley Dennis and Marcílio Jorge Fumagalli, Marília  
268 Farignoli Romeiro and Luiz Carlos Vieira performed the experiments; William Marciel de Souza, Tristan Philip  
269 Wesley Dennis and Robert James Gifford analyzed the data; Sejal Modha, Márcio Roberto Teixeira Nunes and  
270 Luiz Tadeu Mores Figueiredo contributed reagents/materials/analysis tools; Gilberto Sabino-Santos Jr, Felipe  
271 Gonçalves Motta Maia, Gustavo Olszanski Acrani, Adriano de Oliveira Torres Carrasco, Luzia Helena  
272 Queiroz, Jansen de Araujo, Tatiana Lopes Ometto, Edison Luiz Durigon collected samples and performed  
273 fieldwork; William Marciel de Souza, Tristan Philip Wesley Dennis, Luiz Tadeu Moraes Figueiredo and Robert  
274 James Gifford wrote the paper.



275 **Conflicts of Interest:** The authors declare no conflict of interest.

276

## 277 **References**

- 278 1. Cotmore, S.F.; Agbandje-McKenna, M.; Chiorini, J.A.; Mukha, D.V.; Pintel, D.J.; Qiu, J.;  
279 Soderlund-Venermo, M.; Tattersall, P.; Tijssen, P.; Gatherer, D., *et al.* The family parvoviridae. *Arch*  
280 *Virol* **2014**, *159*, 1239-1247.
- 281 2. Qiu, J.; Soderlund-Venermo, M.; Young, N.S. Human parvoviruses. *Clin Microbiol Rev* **2017**, *30*, 43-113.
- 282 3. Miranda, C.; Thompson, G. Canine parvovirus: The worldwide occurrence of antigenic variants. *The*  
283 *Journal of general virology* **2016**, *97*, 2043-2057.
- 284 4. Hargitai, R.; Pankovics, P.; Kertesz, A.M.; Biro, H.; Boros, A.; Phan, T.G.; Delwart, E.; Reuter, G.  
285 Detection and genetic characterization of a novel parvovirus distantly related to human bufavirus in  
286 domestic pigs. *Arch Virol* **2016**, *161*, 1033-1037.
- 287 5. Li, L.; Giannitti, F.; Low, J.; Keyes, C.; Ullmann, L.S.; Deng, X.; Aleman, M.; Pesavento, P.A.; Pusterla,  
288 N.; Delwart, E. Exploring the virome of diseased horses. *The Journal of general virology* **2015**, *96*,  
289 2721-2733.
- 290 6. Souza, W.M.; Romeiro, M.F.; Fumagalli, M.J.; Modha, S.; de Araujo, J.; Queiroz, L.H.; Durigon, E.L.;  
291 Figueiredo, L.T.; Murcia, P.R.; Gifford, R.J. Chapparvoviruses occur in at least three vertebrate classes  
292 and have a broad biogeographic distribution. *The Journal of general virology* **2017**, *98*, 225-229.
- 293 7. Yang, S.; Liu, Z.; Wang, Y.; Li, W.; Fu, X.; Lin, Y.; Shen, Q.; Wang, X.; Wang, H.; Zhang, W. A novel  
294 rodent chapparvovirus in feces of wild rats. *Virol J* **2016**, *13*, 133.
- 295 8. Francois, S.; Filloux, D.; Roumagnac, P.; Bigot, D.; Gayral, P.; Martin, D.P.; Froissart, R.; Ogliastro, M.  
296 Discovery of parvovirus-related sequences in an unexpected broad range of animals. *Scientific reports*  
297 **2016**, *6*, 30880.
- 298 9. Bonvicino, C.R.; Oliveira, J.A.; D'Andrea, P.S. *Guia dos roedores do brasil, com chaves para gêneros*  
299 *baseadas em caracteres externos*. 1st ed.; Centro Pan-Americano de Febre Aftosa-Pan-American Health  
300 Organization//World Health Organization: Rio de Janeiro, Brazil, 2008; p 120.
- 301 10. Ridgely, R.S.; Tudor, G. *The birds of south america*. University of Texas Press, Austin, Texas, 1994; p 940.
- 302 11. Sikes, R.S.; Gannon, W.L. Guidelines of the american society of mammalogists for the use of wild  
303 mammals in research. *Journal of Mammalogy* **2011**, *92*.
- 304 12. de Souza, W.M.; Fumagalli, M.J.; de Araujo, J.; Sabino-Santos, G., Jr.; Maia, F.G.M.; Romeiro, M.F.;  
305 Modha, S.; Nardi, M.S.; Queiroz, L.H.; Durigon, E.L., *et al.* Discovery of novel anelloviruses in small  
306 mammals expands the host range and diversity of the anelloviridae. *Virology* **2018**, *514*, 9-17.
- 307 13. Marchler-Bauer, A.; Derbyshire, M.K.; Gonzales, N.R.; Lu, S.; Chitsaz, F.; Geer, L.Y.; Geer, R.C.; He, J.;  
308 Gwadz, M.; Hurwitz, D.I., *et al.* Cdd: Ncbi's conserved domain database. *Nucleic Acids Res* **2015**, *43*,  
309 D222-226.
- 310 14. Wernersson, R.; Pedersen, A.G. Revtrans: Multiple alignment of coding DNA from aligned amino  
311 acid sequences. *Nucleic Acids Res* **2003**, *31*, 3537-3539.
- 312 15. Kalyaanamoorthy, S.; Minh, B.Q.; Wong, T.K.F.; von Haeseler, A.; Jermin, L.S. Modelfinder: Fast  
313 model selection for accurate phylogenetic estimates. *Nature methods* **2017**, *14*, 587-589.
- 314 16. Nguyen, L.T.; Schmidt, H.A.; von Haeseler, A.; Minh, B.Q. Iq-tree: A fast and effective stochastic  
315 algorithm for estimating maximum-likelihood phylogenies. *Mol Biol Evol* **2015**, *32*, 268-274.
- 316 17. Muhire, B.M.; Varsani, A.; Martin, D.P. Sdt: A virus classification tool based on pairwise sequence  
317 alignment and identity calculation. *PLoS one* **2014**, *9*, e108277.

- 318 18. Lau, S.K.; Woo, P.C.; Tse, H.; Fu, C.T.; Au, W.K.; Chen, X.C.; Tsoi, H.W.; Tsang, T.H.; Chan, J.S.;  
319 Tsang, D.N., *et al.* Identification of novel porcine and bovine parvoviruses closely related to human  
320 parvovirus 4. *The Journal of general virology* **2008**, *89*, 1840-1848.
- 321 19. Xu, F.; Pan, Y.; Wang, M.; Wu, X.; Tian, L.; Baloch, A.R.; Zeng, Q. First detection of ungulate  
322 tetraparvovirus 1 (bovine hokovirus 1) in domestic yaks in northwestern china. *Arch Virol* **2016**, *161*,  
323 177-180.
- 324 20. Sasaki, M.; Gonzalez, G.; Wada, Y.; Setiyono, A.; Handharyani, E.; Rahmadani, I.; Taha, S.; Adiani, S.;  
325 Latief, M.; Kholilullah, Z.A., *et al.* Divergent bufavirus harboured in megabats represents a new  
326 lineage of parvoviruses. *Scientific reports* **2016**, *6*, 24257.
- 327 21. Ros, C.; Gerber, M.; Kempf, C. Conformational changes in the vp1-unique region of native human  
328 parvovirus b19 lead to exposure of internal sequences that play a role in virus neutralization and  
329 infectivity. *Journal of virology* **2006**, *80*, 12017-12024.
- 330 22. Castellanos, M.; Perez, R.; Rodriguez-Huete, A.; Grueso, E.; Almendral, J.M.; Mateu, M.G. A slender  
331 tract of glycine residues is required for translocation of the vp2 protein n-terminal domain through  
332 the parvovirus mvm capsid channel to initiate infection. *Biochem J* **2013**, *455*, 87-94.
- 333 23. Olival, K.J.; Hosseini, P.R.; Zambrana-Torrel, C.; Ross, N.; Bogich, T.L.; Daszak, P. Host and viral  
334 traits predict zoonotic spillover from mammals. *Nature* **2017**, *546*, 646-650.
- 335 24. Kailasan, S.; Agbandje-McKenna, M.; Parrish, C.R. Parvovirus family conundrum: What makes a  
336 killer? *Annu Rev Virol* **2015**, *2*, 425-450.
- 337 25. Huang, Q.; Deng, X.; Yan, Z.; Cheng, F.; Luo, Y.; Shen, W.; Lei-Butters, D.C.; Chen, A.Y.; Li, Y.; Tang,  
338 L., *et al.* Establishment of a reverse genetics system for studying human bocavirus in human airway  
339 epithelia. *PLoS pathogens* **2012**, *8*, e1002899.
- 340 26. Sun, Y.; Chen, A.Y.; Cheng, F.; Guan, W.; Johnson, F.B.; Qiu, J. Molecular characterization of  
341 infectious clones of the minute virus of canines reveals unique features of bocaviruses. *Journal of*  
342 *virology* **2009**, *83*, 3956-3967.
- 343 27. Zou, W.; Cheng, F.; Shen, W.; Engelhardt, J.F.; Yan, Z.; Qiu, J. Nonstructural protein np1 of human  
344 bocavirus 1 plays a critical role in the expression of viral capsid proteins. *Journal of virology* **2016**, *90*,  
345 4658-4669.
- 346 28. Zhang, R.; Fang, L.; Wu, W.; Zhao, F.; Song, T.; Xie, L.; Li, Y.; Chen, H.; Xiao, S. Porcine bocavirus np1  
347 protein suppresses type i ifn production by interfering with irf3 DNA-binding activity. *Virus Genes*  
348 **2016**, *52*, 797-805.
- 349 29. Souza, C.K.; Streck, A.F.; Goncalves, K.R.; Pinto, L.D.; Ravazzolo, A.P.; de Barcellos, D.E.; Canal, C.W.  
350 Phylogenetic characterization of the first ungulate tetraparvovirus 2 detected in pigs in brazil.  
351 *Brazilian journal of microbiology : [publication of the Brazilian Society for Microbiology]* **2016**, *47*, 513-517.
- 352 30. Katzourakis, A.; Gifford, R.J. Endogenous viral elements in animal genomes. *PLoS Genet* **2010**, *6*,  
353 e1001191.
- 354 31. Liu, H.; Fu, Y.; Xie, J.; Cheng, J.; Ghabrial, S.A.; Li, G.; Peng, Y.; Yi, X.; Jiang, D. Widespread  
355 endogenization of densoviruses and parvoviruses in animal and human genomes. *Journal of virology*  
356 **2011**, *85*, 9863-9876.
- 357 32. Lau, S.K.P.; Ahmed, S.S.; Tsoi, H.W.; Yeung, H.C.; Li, K.S.M.; Fan, R.Y.Y.; Zhao, P.S.H.; Lau, C.C.C.;  
358 Lam, C.S.F.; Choi, K.K.F., *et al.* Bats host diverse parvoviruses as possible origin of mammalian  
359 dependoparvoviruses and source for bat-swine interspecies transmission. *The Journal of general*  
360 *virology* **2017**.

- 361 33. Hu, D.; Zhu, C.; Wang, Y.; Ai, L.; Yang, L.; Ye, F.; Ding, C.; Chen, J.; He, B.; Zhu, J., *et al.* Virome  
362 analysis for identification of novel mammalian viruses in bats from southeast china. *Scientific reports*  
363 **2017**, *7*, 10917.
- 364 34. Marusak, R.A.; Guy, J.S.; Abdul-Aziz, T.A.; West, M.A.; Fletcher, O.J.; Day, J.M.; Zsak, L.; Barnes, H.J.  
365 Parvovirus-associated cerebellar hypoplasia and hydrocephalus in day old broiler chickens. *Avian*  
366 *diseases* **2010**, *54*, 156-160.
- 367 35. Day, J.M.; Zsak, L. Determination and analysis of the full-length chicken parvovirus genome. *Virology*  
368 **2010**, *399*, 59-64.
- 369 36. Allander, T.; Emerson, S.U.; Engle, R.E.; Purcell, R.H.; Bukh, J. A virus discovery method  
370 incorporating dnase treatment and its application to the identification of two bovine parvovirus  
371 species. *Proc Natl Acad Sci U S A* **2001**, *98*, 11609-11614.
- 372 37. Janus, L.M.; Mahler, M.; Kohl, W.; Smoczek, A.; Hedrich, H.J.; Bleich, A. Minute virus of mice:  
373 Antibody response, viral shedding, and persistence of viral DNA in multiple strains of mice.  
374 *Comparative medicine* **2008**, *58*, 360-368.
- 375 38. Proenca-Modena, J.L.; Gagliardi, T.B.; Paula, F.E.; Iwamoto, M.A.; Criado, M.F.; Camara, A.A.; Acrani,  
376 G.O.; Cintra, O.A.; Cervi, M.C.; Arruda, L.K., *et al.* Detection of human bocavirus mrna in respiratory  
377 secretions correlates with high viral load and concurrent diarrhea. *PloS one* **2011**, *6*, e21083.
- 378 39. Lau, S.K.; Yeung, H.C.; Li, K.S.; Lam, C.S.; Cai, J.P.; Yuen, M.C.; Wang, M.; Zheng, B.J.; Woo, P.C.;  
379 Yuen, K.Y. Identification and genomic characterization of a novel rat bocavirus from brown rats in  
380 china. *Infection, genetics and evolution : journal of molecular epidemiology and evolutionary genetics in*  
381 *infectious diseases* **2017**, *47*, 68-76.
- 382 40. Allison, A.B.; Kohler, D.J.; Fox, K.A.; Brown, J.D.; Gerhold, R.W.; Shearn-Bochsler, V.I.; Dubovi, E.J.;  
383 Parrish, C.R.; Holmes, E.C. Frequent cross-species transmission of parvoviruses among diverse  
384 carnivore hosts. *Journal of virology* **2013**, *87*, 2342-2347.
- 385 41. Parrish, C.R.; Holmes, E.C.; Morens, D.M.; Park, E.C.; Burke, D.S.; Calisher, C.H.; Laughlin, C.A.; Saif,  
386 L.J.; Daszak, P. Cross-species virus transmission and the emergence of new epidemic diseases.  
387 *Microbiology and molecular biology reviews : MMBR* **2008**, *72*, 457-470.
- 388 42. Canuti, M.; Whitney, H.G.; Lang, A.S. Amdoparvoviruses in small mammals: Expanding our  
389 understanding of parvovirus diversity, distribution, and pathology. *Frontiers in microbiology* **2015**, *6*,  
390 1119.

391
